# Supplementary material for: Open Source Pharmacokinetic/Pharmacodynamic Framework: Tutorial on the BioGears Engine
Source: PubMed Central journal article supplement — CPT Pharmacometrics Syst Pharmacol. 2019 Jan 20;8(1):12–25. doi: 10.1002/psp4.12371 (PMC6363067; doi:10.1002/psp4.12371), 2019-01-20
Supplement: PSP4-8-12-s001.pdf [file PSP4-8-12-s001.pdf]

## Supplementary Materials – Tables and User Interface

Table S1: BioGears Substance Library

| Substance       | Class           | Substance              | Class                  |
|-----------------|-----------------|------------------------|------------------------|
| Carbon dioxide  | Gas             | Furosemide             | Drug                   |
| Carbon monoxide | Gas             | Ketamine               | Drug/Anesthetic        |
| Nitrogen        | Gas             | Midazolam              | Drug/Sedative          |
| Oxygen          | Gas             | Morphine               | Drug/Opioid            |
| Bicarbonate     | Electrolyte     | Naloxone               | Drug                   |
| Calcium         | Electrolyte     | Norepinephrine         | Drug                   |
| Chloride        | Electrolyte     | Pralidoxime            | Drug                   |
| Potassium       | Electrolyte     | Prednisone             | Drug                   |
| Sodium          | Electrolyte     | Propofol               | Drug/Anesthetic        |
| Epinephrine     | Hormone/Drug    | Rocuronium             | Drug/Anesthetic        |
| Glucagon        | Hormone         | Sarin                  | Drug/Inhaled substance |
| Insulin         | Hormone         | Succinylcholine        | Drug/Anesthetic        |
| AminoAcids      | Metabolite      | Vasopressin            | Drug                   |
| Creatinine      | Metabolite      | Albumin                | Protein                |
| Glucose         | Metabolite      | Globulin               | Protein                |
| Ketones         | Metabolite      | Hemoglobin             | Protein                |
| Lactate         | Metabolite      | Oxyhemoglobin          | Bound hemoglobin       |
| Triacylglycerol | Metabolite      | Carboxyhemoglobin      | Bound hemoglobin       |
| Urea            | Metabolite      | Carbaminohemoglobin    | Bound hemoglobin       |
| Albuterol       | Drug/Aerosol    | Oxycarbaminohemoglobin | Bound hemoglobin       |
| Desflurane      | Drug/Anesthetic | ForestFireParticulate  | Inhaled substance      |
| Fentanyl        | Drug/Opioid     |                        |                        |

Table S2: Pharmacodynamic effect modifiers currently supported by BioGears.

| Effect Modifier          | Description                                                                                                                                    | Values  |
|--------------------------|------------------------------------------------------------------------------------------------------------------------------------------------|---------|
| Bronchodilation          | Decreases (<0) or increases (>0) the bronchi radii. A maximum value of 1.0 will completely reverse asthma attack                               | -1 to 1 |
| Central Nervous Response | Suppressive effect on mu receptors directing chemoreceptor response (i.e. opioid action), with 1.0 being complete suppression                  | 0 to 1  |
| Diastolic Pressure       | Fractional change in diastolic pressure                                                                                                        | -1 to 1 |
| Heart Rate               | Fractional change in heart rate                                                                                                                | -1 to 1 |
| Neuromuscular Block      | Strength of neuromuscular blocking agent, with 1.0 being strongest block                                                                       | 0 to 1  |
| Pupil Size               | Change in pupil diameter                                                                                                                       | -1 to 1 |
| Pupil Reactivity         | Change in pupil reactivity to light                                                                                                            | -1 to 1 |
| Respiration Rate         | Fractional change in respiration rate                                                                                                          | -1 to 1 |
| Sedation                 | Strength as sedative, with 1.0 being the strongest effect                                                                                      | 0 to 1  |
| Systolic Pressure        | Fractional change in systolic pressure                                                                                                         | -1 to 1 |
| Tidal Volume             | Fractional change in tidal volume                                                                                                              | -1 to 1 |
| Tubular Permeability     | Severity of reabsorption block in renal tubules, with 1.0 being complete block. A value of -1.0 increases the permeability by a factor of two. | -1 to 1 |

Table S3: Additional optional substance parameters. Parameter names are written exactly as they appear in the substance schema. If the parameter is a sub-element of a complex schema type, the parent node is noted.

| Parameter                    | Description                                                                                                                                                       | Parent Node    |
|------------------------------|-------------------------------------------------------------------------------------------------------------------------------------------------------------------|----------------|
| Density                      | Standard definition                                                                                                                                               | None           |
| MaximumDiffusionFlux         | Signals BioGears Tissue system to transport substance by facilitated diffusion. This is maximum rate that a substance can be transferred by facilitated diffusion | None           |
| MichaelisCoefficient         | Facilitated diffusion occurs according to Michaelis kinetics. This parameter is required if a MaximumDiffusionFlux is defined.                                    | None           |
| MembraneResistance           | The tendency of electrolytes (i.e. sodium, potassium) to diffuse across the cell membrane                                                                         | None           |
| MolarMass                    | Standard definition                                                                                                                                               | None           |
| RelativeDiffusionCoefficient | Defines tendency of gases to be transported in alveoli (value relative to oxygen)                                                                                 | None           |
| Aerosolization               | Indicates that substance is an aerosol                                                                                                                            | None           |
| BronchioleModifier           | PD modifier for aerosol effect on bronchioles                                                                                                                     | Aerosolization |
| InflammationCoefficient      | PD modifier for aerosol tendency to inflame lungs                                                                                                                 | Aerosolization |
| ParticulateSizeDistribution  | Histogram defining aerosol particle sizes to determine where in lungs substance is deposited                                                                      | Aerosolization |
| ChargeInBlood                | Ion charge                                                                                                                                                        | RenalDynamics  |
| FractionUnboundInPlasma      | Standard definition (required here for data encapsulation)                                                                                                        | RenalDynamics  |
| ReabsorptionRatio            | Amount substance reabsorbed in kidneys per unit volume water reabsorbed                                                                                           | RenalDynamics  |
| TransportMaximum             | The maximum rate of substance transport in the kidneys                                                                                                            | RenalDynamics  |

Table S4: Water and lipid volume fractions and tissue to plasma protein ratios for BioGears compartments. Values are used in the equations of Rodgers and Rowland to predict Tissue:Plasma partition coefficients for substances in each compartment.

| Tissue        | $f_{EW}$ | $f_{IW}$ | $f_{NL}$ | $f_{NP}$ | Protein $K_{TP}$ |             |       |
|---------------|----------|----------|----------|----------|------------------|-------------|-------|
|               |          |          |          |          | Albumin          | Lipoprotein | AAG   |
| --            | --       | --       | --       | --       |                  |             |       |
| Adipose (Fat) | 0.135    | 0.017    | 0.853    | 0.0016   | 0.049            | 0.068       | 0.049 |
| Bone          | 0.1      | 0.346    | 0.017    | 0.0017   | 0.100            | 0.050       | 0.100 |
| Brain         | 0.162    | 0.620    | 0.039    | 0.0015   | 0.048            | 0.041       | 0.048 |
| Gut           | 0.282    | 0.475    | 0.038    | 0.0125   | 0.158            | 0.0141      | 0.158 |
| Kidney        | 0.273    | 0.483    | 0.012    | 0.2420   | 0.130            | 0.137       | 0.13  |
| Liver         | 0.161    | 0.573    | 0.014    | 0.2400   | 0.086            | 0.161       | 0.086 |
| Lung          | 0.336    | 0.446    | 0.022    | 0.0128   | 0.212            | 0.168       | 0.212 |
| Muscle        | 0.118    | 0.630    | 0.010    | 0.0072   | 0.064            | 0.059       | 0.064 |
| Myocardium    | 0.320    | 0.456    | 0.014    | 0.0111   | 0.157            | 0.160       | 0.157 |
| Skin          | 0.382    | 0.291    | 0.060    | 0.0044   | 0.277            | 0.096       | 0.277 |
| Spleen        | 0.207    | 0.579    | 0.0077   | 0.0113   | 0.277            | 0.207       | 0.277 |

- $f_{EW}$  = Extracellular water fraction
- $f_{IW}$  = Intracellular water fraction
- $f_{NL}$  = Neutral lipid fraction
- $f_{NP}$  = Neutral phospholipid fraction
- $K_{TP}$  = Tissue:Plasma partition coefficient

**Table S5: Tissue:Plasma partition coefficients for Vasopressin predicted by BioGears PK/PD model**

| Tissue                  | $K_{TP}$ | Tissue                | $K_{TP}$ |
|-------------------------|----------|-----------------------|----------|
| Adipose (Fat)           | 0.1523   | Lung (Left and Right) | 0.7823   |
| Brain                   | 0.8138   | Muscle                | 0.7461   |
| Bone                    | 0.4432   | Myocardium            | 0.7812   |
| Gut                     | 0.7622   | Skin                  | 0.6765   |
| Kidney (Left and Right) | 0.7608   | Spleen                | 0.7944   |
| Liver                   | 0.7449   |                       |          |

Model-Code S1: Vasopressin extensible markup language (XML) schema definition.

```

<?xml version="1.0" encoding="UTF-8" standalone="yes"?>
<Substance xmlns="uri:/mil/tatrc/physiology/datamodel"
xmlns:xsi="http://www.w3.org/2001/XMLSchema-instance" contentVersion="BioGears_6.3.0-
beta" xsi:schemaLocation="">
  <Name>Vasopressin</Name>
  <MolarMass value="1084.24" unit="g/mol"/>
  <State>Liquid</State>
  <Clearance>
    <Systemic>
      <FractionExcretedInFeces value="0.0"/>
      <FractionUnboundInPlasma value="0.99"/>
      <IntrinsicClearance value="0.0" unit="mL/min kg"/>
      <RenalClearance value="1.13" unit="mL/min kg"/>
      <SystemicClearance value="15.17" unit="mL/min kg"/>
    </Systemic>
    <RenalDynamics>
      <Clearance value="1.13" unit="mL/min kg"/>
    </RenalDynamics>
  </Clearance>
  <Pharmacokinetics>
    <Physicochemicals>
      <AcidDissociationConstant value="9.8"/>
      <BindingProtein>Albumin</BindingProtein>
      <BloodPlasmaRatio value="1.0"/>
      <FractionUnboundInPlasma value="0.99"/>
      <IonicState>Neutral</IonicState>
      <LogP value="-4.8"/>
    </Physicochemicals>
  </Pharmacokinetics>
  <Pharmacodynamics>
    <Bronchodilation value="0.0"/>
    <DiastolicPressureModifier value="0.9"/>
    <EC50 value="0.001" unit="ug/mL"/>
    <EMaxShapeParameter value="1"/>
    <HeartRateModifier value="0.0"/>
    <NeuromuscularBlock value="0.0"/>
    <PupillaryResponse>
      <ReactivityModifier value="0.0"/>
      <SizeModifier value="0.0"/>
    </PupillaryResponse>
    <RespirationRateModifier value="0.0"/>
    <Sedation value="0.0"/>
    <SystolicPressureModifier value="0.9"/>
    <TidalVolumeModifier value="0.0"/>
    <TubularPermeabilityModifier value="-1.0"/>
    <CentralNervousModifier value="0.0"/>
    <EffectSiteRateConstant value="0.0" unit="1/min"/>
  </Pharmacodynamics>
</Substance>

```

Model-Code S2: VasopressinInSaline Substance Compound XML definition. In BioGears, a Substance Compound is defined by a list of components. The concentration of each component in the compound must be explicitly defined. All components must be already defined in the *Substances* folder. We create this particular Substance Compound by copying the definition of the Saline Substance Compound and appending a Vasopressin component.

```
<?xml version="1.0" encoding="UTF-8" standalone="yes"?>
<SubstanceCompound xmlns="uri:/mil/tatrc/physiology/datamodel"
xmlns:xsi="http://www.w3.org/2001/XMLSchema-instance" contentVersion="BioGears_6.3.0-beta"
xsi:schemaLocation="">
  <Name>VasopressinInSaline</Name>
  <Component Name="Sodium">
    <Concentration value="0.354" unit="g/dL"/>
  </Component>
  <Component Name="Chloride">
    <Concentration value="0.546" unit="g/dL"/>
  </Component>
  <Component Name="Oxygen">
    <Concentration value="0.0329" unit="g/L"/>
  </Component>
  <Component Name="CarbonDioxide">
    <Concentration value="0.786" unit="g/L"/>
  </Component>
  <Component Name="Vasopressin">
    <Concentration value="1.0" unit="mg/L"/>
    <!--Assuming 200 Units / 500 mL and 2 U = 5 ug-->
  </Component>
</SubstanceCompound>
```

Figure S1: BioGears GUI scenario window defining the cardiovascular pharmacodynamic scenario.

**Substance Infusion**  
...Rate: 1.0mL/min  
...Concentration: 0.0117ug/mL  
...Substance: Vasopressin  
**Advance Time**  
...Time: 55.0min (Scenario time:0s)  
**Substance Infusion**  
...Rate: 1.0mL/min  
...Concentration: 0.0312ug/mL  
...Substance: Vasopressin  
**Advance Time**  
...Time: 55.0min (Scenario time:3300s)

Figure S2: BioGears GUI scenario window defining the renal pharmacodynamic scenario.

**Substance Infusion**  
...Rate: 1.0mL/min  
...Concentration: 9.0625E-4ug/mL  
...Substance: Vasopressin  
**Advance Time**  
...Time: 60.0min (Scenario time:0s)  
**Substance Infusion**  
...Rate: 1.0mL/min  
...Concentration: 0.0018125ug/mL  
...Substance: Vasopressin  
**Advance Time**  
...Time: 60.0min (Scenario time:3600s)  
**Substance Infusion**  
...Rate: 1.0mL/min  
...Concentration: 0.003625ug/mL  
...Substance: Vasopressin  
**Advance Time**  
...Time: 60.0min (Scenario time:7200s)  
**Substance Infusion**  
...Rate: 1.0mL/min  
...Concentration: 0.00725ug/mL  
...Substance: Vasopressin  
**Advance Time**  
...Time: 60.0min (Scenario time:10800s)  
**Substance Infusion**  
...Rate: 1.0mL/min  
...Concentration: 0.0145ug/mL  
...Substance: Vasopressin  
**Advance Time**  
...Time: 60.0min (Scenario time:14400s)

Figure S3: BioGears GUI scenario windows comparing two treatment regimens for resuscitation from massive hemorrhage: saline only (left) and saline with vasopressin (right). The treatments are identical except for the fifth action.



**Hemorrhage**  
...Compartment: VenaCava  
...Initial Bleeding Rate: 350.0  
...Injury Code: 52660  
**Advance Time**  
...Time: 15.0min (Scenario time:0s)  
**Stop Hemorrhage**  
...Compartment: VenaCava  
**Compound Infusion**  
...Rate: 200.0mL/min  
...Bag Volume: 1000.0mL  
...Substance Compound: Saline  
**Compound Infusion**  
...Rate: 0.5mL/min  
...Bag Volume: 500.0mL  
...Substance Compound: Saline  
**Advance Time**  
...Time: 15.0min (Scenario time:900s)  
**Compound Infusion**  
...Rate: 200.0mL/min  
...Bag Volume: 1000.0mL  
...Substance Compound: Saline  
**Advance Time**  
...Time: 15.0min (Scenario time:1800s)  
**Compound Infusion**  
...Rate: 30.0mL/min  
...Bag Volume: 300.0mL  
...Substance Compound: Blood  
**Advance Time**  
...Time: 10.0min (Scenario time:2700s)  
**Compound Infusion**  
...Rate: 30.0mL/min  
...Bag Volume: 300.0mL  
...Substance Compound: Blood  
**Advance Time**  
...Time: 10.0min (Scenario time:3300s)

**Hemorrhage**  
...Compartment: VenaCava  
...Initial Bleeding Rate: 350.0  
...Injury Code: 52660  
**Advance Time**  
...Time: 15.0min (Scenario time:0s)  
**Stop Hemorrhage**  
...Compartment: VenaCava  
**Compound Infusion**  
...Rate: 200.0mL/min  
...Bag Volume: 1000.0mL  
...Substance Compound: Saline  
**Compound Infusion**  
...Rate: 0.5mL/min  
...Bag Volume: 500.0mL  
...Substance Compound: VasopressinInSaline  
**Advance Time**  
...Time: 15.0min (Scenario time:900s)  
**Compound Infusion**  
...Rate: 200.0mL/min  
...Bag Volume: 1000.0mL  
...Substance Compound: Saline  
**Advance Time**  
...Time: 15.0min (Scenario time:1800s)  
**Compound Infusion**  
...Rate: 30.0mL/min  
...Bag Volume: 300.0mL  
...Substance Compound: Blood  
**Advance Time**  
...Time: 10.0min (Scenario time:2700s)  
**Compound Infusion**  
...Rate: 30.0mL/min  
...Bag Volume: 300.0mL  
...Substance Compound: Blood  
**Advance Time**  
...Time: 10.0min (Scenario time:3300s)

***Additional help build source code form github:***

[Youtube Link](#)
